# Supplementary material for: Evaluation of Internal Medicine Physician or Multidisciplinary Team Comanagement of Surgical Patients and Clinical Outcomes: A Systematic Review and Meta-analysis
Source: PubMed Central journal article supplement (PMC7201311; doi:10.1001/jamanetworkopen.2020.4088), 2020-05-05

## Supplementary Online Content

Shaw M, Pelecanos A, Mudge AM. Evaluation of internal medicine physician or multidisciplinary team comanagement of surgical patients and clinical outcomes. *JAMA Netw Open*. 2020;3(5):e204088. doi:10.1001/jamanetworkopen.2020.4088

**eAppendix.** Example Search String

**eTable 1.** Intervention Characteristics Described in Studies in Review, Based on Indicators Developed for Geriatric Comanagement Models

**eTable 2.** Risk of Bias for Included Studies for the Outcomes of Length of Stay, Mortality, and Readmissions

**eFigure 1.** Forest Plot for Unadjusted Length of Stay by Physician-Only or Multidisciplinary Team (MDT) Model

**eFigure 2.** Forest Plot for Unadjusted Length of Stay by Elective or Emergency Status

**eFigure 3.** Funnel Plots for Length of Stay, Mortality, and Readmissions

**eFigure 4.** Forest Plot for In-Hospital Mortality by Physician-Only or Multidisciplinary Team (MDT) Model

**eFigure 5.** Forest Plot for In-Hospital Mortality by Elective or Emergency Status

**eFigure 6.** Forest Plot for 30-Day Readmissions

This supplementary material has been provided by the authors to give readers additional information about their work.

**eAppendix. Example Search String**

Clinical Question: In adult surgical patients, does internal medicine (IM) physician involvement with or without a multidisciplinary team improve clinical or health service outcomes when compared to standard surgical care?

MEDLINE

|   | <b>Search string</b>                                                                                                                                                                                                                                                                    | <b>Results</b>   |
|---|-----------------------------------------------------------------------------------------------------------------------------------------------------------------------------------------------------------------------------------------------------------------------------------------|------------------|
| 1 | TI surgery OR AB surgery OR TI surgical OR AB surgical OR TI surgeon OR AB surgeon OR MM "postoperative care" OR MM "postoperative complications" OR MM "postoperative period" OR MM "perioperative care" OR MM "preoperative care" OR MM "preoperative period"                         | <b>1,790,187</b> |
| 2 | TI hospitalist* OR AB hospitalist* OR TI internist* OR AB internist* OR TI physician OR AB physician OR TI "general medicine" OR AB "general medicine" OR TI "perioperative medicine" OR AB "perioperative medicine" OR MM hospitalists OR MM "internal medicine"                       | <b>373,912</b>   |
| 3 | TI comanagement OR AB comanagement OR TI co-management OR AB co-management OR TI "shared care" OR AB "shared care" OR TI consult OR AB consult OR TI consultant OR AB consultant OR TI consultation OR AB consultation OR MM "Referral and Consultation" OR MM "Models, Organizational" | <b>116,213</b>   |
| 4 | 1 AND 2 AND 3                                                                                                                                                                                                                                                                           | <b>2,301</b>     |

**eTable 1.** Intervention Characteristics Described in Studies in Review, Based on Indicators Developed for Geriatric Comanagement Models<sup>1</sup>

| Study                              | Specialty                  | Physician              | Structure indicators |                    |            |                     |                                            |                          |                     | Process indicators |              |             |                       |                    |                   |
|------------------------------------|----------------------------|------------------------|----------------------|--------------------|------------|---------------------|--------------------------------------------|--------------------------|---------------------|--------------------|--------------|-------------|-----------------------|--------------------|-------------------|
|                                    |                            |                        | MDT                  | Daily availability | Regular QI | Selection Screening | Inclusion criteria                         | Evidence-based protocols | Standard order sets | Co-management      | Daily rounds | MDT meeting | Advance care planning | Discharge planning | Pre-op assessment |
| Zuckerman (1992) <sup>2</sup>      | Orthopaedic                | Internist <sup>a</sup> | ✓                    |                    |            | ✓                   | Age 65+, premorbid status                  |                          |                     |                    |              | ✓ weekly    |                       |                    |                   |
| Macpherson (1994) <sup>3</sup>     | Thoracic                   | Internist              |                      | ✓                  |            |                     | All patients                               |                          |                     | ✓                  | ✓            |             |                       | ✓                  | ✓                 |
| Huddleston (2004) <sup>4</sup>     | Orthopaedic                | Hospitalist            |                      | ✓                  |            | ✓                   | Age 75+, co-morbidities                    |                          | ✓                   | ✓                  | ✓            |             |                       | ✓                  | ✓                 |
| Pinzur (2009) <sup>5</sup>         | Orthopaedic                | Hospitalist            |                      | ✓                  |            | ✓                   | Co-morbidity or social issue               | ✓                        | ✓                   | ✓                  | ✓            |             |                       | ✓                  | ✓                 |
| Salottolo (2009) <sup>6</sup>      | Trauma                     | Hospitalist            |                      | ✓                  | ✓          | ✓                   | 11 exclusion criteria                      | ✓                        |                     |                    | ✓            |             |                       |                    |                   |
| Auerbach (2010) <sup>7</sup>       | Neurosurgery               | Hospitalist            |                      | ✓                  |            | ✓                   | Comorbidities, high risk for complications |                          | ✓                   | ✓                  | ✓            |             |                       |                    |                   |
| Della Rocca (2013) <sup>8</sup>    | Orthopaedic                | Internist <sup>b</sup> | ✓                    | ✓                  | ✓          |                     | Age 65+                                    | ✓                        | ✓                   | ✓                  | ✓            | ✓ unclear   |                       | ✓                  | ✓                 |
| Montero Ruiz (2015a) <sup>9</sup>  | Otolaryngology             | Internist              |                      | ✓                  |            |                     | All patients                               |                          |                     | ✓                  |              |             |                       |                    |                   |
| Montero Ruiz (2015b) <sup>10</sup> | Ophthalmology              | Internist              |                      | ✓                  |            |                     | All patients                               |                          |                     | ✓                  |              |             |                       |                    |                   |
| Iberty (2016) <sup>11</sup>        | Vascular                   | Hospitalist            | ✓                    | ✓                  | ✓          | ✓                   | ASA 3+, LOS >1 day                         |                          |                     | ✓                  | ✓            | ✓ daily     |                       |                    |                   |
| Noticewala (2016) <sup>12</sup>    | Orthopaedic                | Hospitalist            | ✓                    | ✓                  |            |                     | All patients                               |                          | ✓                   | ✓                  | ✓            | ✓ daily     |                       |                    |                   |
| Rohatgi (2016) <sup>13</sup>       | Orthopaedic & Neurosurgery | Hospitalist            | ✓                    | ✓                  | ✓          |                     | All patients                               | ✓                        | ✓                   | ✓                  | ✓            | ✓ daily     |                       | ✓                  | ✓                 |

|                              |             |             |   |   |   |  |              |   |   |   |   |         |                   |   |   |
|------------------------------|-------------|-------------|---|---|---|--|--------------|---|---|---|---|---------|-------------------|---|---|
| Soong (2016) <sup>14</sup>   | Orthopaedic | Hospitalist | ✓ | ✓ | ✓ |  | All patients | ✓ | ✓ | ✓ | ✓ | ✓ daily | ✓ family meetings | ✓ | ✓ |
| Rohatgi (2018) <sup>15</sup> | Colorectal  | Hospitalist | ✓ | ✓ | ✓ |  | All patients | ✓ | ✓ | ✓ | ✓ | ✓ daily |                   | ✓ | ✓ |

MDT multidisciplinary team; QI quality improvement; ASA American society of anaesthesiologist physical status classification class; LOS length of stay

<sup>a</sup> model also included geriatricians

<sup>b</sup> model also included geriatricians and family practitioners

1. Van Grootven B, McNicoll L, Mendelson DA, et al. Quality indicators for in-hospital geriatric co-management programmes: a systematic literature review and international Delphi study. *BMJ Open*. 2018;8(3):e020617.
2. Zuckerman JD, Sakales SR, Fabian DR, Frankel VH. Hip fractures in geriatric patients: Results of an interdisciplinary hospital care program. *Clin Orthop Relat Res*. 1992(274):213-225.
3. Macpherson DS, Parenti C, Nee J, Petzel RA, Ward H. An internist joins the surgery service: does comanagement make a difference? *J Gen Intern Med*. 1994;9(8):440-444.
4. Huddleston JM, Long KH, Naessens JM, et al. Medical and surgical comanagement after elective hip and knee arthroplasty: a randomized, controlled trial. *Ann Intern Med*. 2004;141(1):28-38.
5. Pinzur MS, Gurza E, Kristopaitis T, et al. Hospitalist-orthopedic co-management of high-risk patients undergoing lower extremity reconstruction surgery. *Orthop*. 2009;32(7):495-495.
6. Salottolo K, Slone DS, Howell P, et al. Effects of a nonsurgical hospitalist service on trauma patient outcomes. *Surg*. 2009;145(4):355-361.
7. Auerbach AD, Wachter RM, Cheng HQ, et al. Comanagement of surgical patients between neurosurgeons and hospitalists. *Arch Intern Med*. 2010;170(22):2004-2010.
8. Della Rocca GJ, Moylan KC, Crist BD, Volgas DA, Stannard JP, Mehr DR. Comanagement of geriatric patients with hip fracture: a retrospective, controlled, cohort study. *Geriatr Orthop Surg Rehabil*. 2013;4(1):10-15.
9. Montero Ruiz E, Rebollar Merino Á, Rivera Rodríguez T, García Sánchez M, Agudo Alonso R, Barbero Allende JM. Effect of comanagement with internal medicine on hospital stay of patients admitted to the Service of Otolaryngology. *Acta Otorrinolaringol Esp*. 2015;66(5):264-268.
10. Montero Ruiz E, Rebollar Merino A, Castejón Cervero MA, Barbero Allende JM, Culebras López A, García Sánchez M. Effect of co-management with Internal Medicine on hospital stay in Ophthalmology. *Arch Soc Esp Oftalmol*. 2015;90(6):253-256.
11. Iberti CT, Briones A, Gabriel E, Dunn AS. Hospitalist-vascular surgery comanagement: effects on complications and mortality. *Hosp Pract (1995)*. 2016;44(5):233-236.
12. Noticewala MS, Swart E, Shah RP, Macaulay W, Geller JA. First Place Award: Multidisciplinary care of the hip fracture patient: A case control analysis of differing treatment protocols. *Curr Orthop Pract*. 2016;27(4):346-350.
13. Rohatgi N, Loftus P, Grujic O, Cullen M, Hopkins J, Ahuja N. Surgical comanagement by hospitalists improves patient outcomes: a propensity score analysis. *Ann Surg*. 2016;264(2):275-282.
14. Soong C, Cram P, Chezar K, et al. Impact of an integrated hip fracture inpatient program on length of stay and costs. *J Orthop Trauma*. 2016;30(12):647-652.
15. Rohatgi N, Wei PH, Grujic O, Ahuja N. Surgical comanagement by hospitalists in colorectal surgery. *J Am Coll Surg*. 2018;227:404-410.

**eTable 2.** Risk of Bias for Included Studies for the Outcomes of Length of Stay, Mortality, and Readmissions  
**Red indicates high risk, orange moderate and green low risk.**

| Study               | Randomization process | Confounding            | Selection              | Classification of interventions | Deviation from intended interventions | Missing data     | Measurement of outcomes | Selection of reported result | Overall risk of bias   |
|---------------------|-----------------------|------------------------|------------------------|---------------------------------|---------------------------------------|------------------|-------------------------|------------------------------|------------------------|
| Zuckerman (1991)    |                       | High Risk (Red)        | Low Risk (Green)       | Low Risk (Green)                | High Risk (Red)                       | Low Risk (Green) | Low Risk (Green)        | Moderate Risk (Orange)       | High Risk (Red)        |
| Macpherson (1994)   |                       | Moderate Risk (Orange) | High Risk (Red)        | Low Risk (Green)                | Low Risk (Green)                      | Low Risk (Green) | Low Risk (Green)        | Moderate Risk (Orange)       | High Risk (Red)        |
| Huddleston (2004)   | Low Risk (Green)      |                        |                        |                                 |                                       |                  |                         | Low Risk (Green)             | Low Risk (Green)       |
| Pinzur (2006)       |                       | High Risk (Red)        | High Risk (Red)        | Low Risk (Green)                | Low Risk (Green)                      | Low Risk (Green) | Low Risk (Green)        | High Risk (Red)              | High Risk (Red)        |
| Salottolo (2009)    |                       | Moderate Risk (Orange) | Moderate Risk (Orange) | Low Risk (Green)                | High Risk (Red)                       | Low Risk (Green) | Low Risk (Green)        | Moderate Risk (Orange)       | High Risk (Red)        |
| Auerbach (2010)     |                       | Moderate Risk (Orange) | Low Risk (Green)       | Low Risk (Green)                | Moderate Risk (Orange)                | Low Risk (Green) | Low Risk (Green)        | Moderate Risk (Orange)       | Moderate Risk (Orange) |
| Della Rocca (2013)  |                       | High Risk (Red)        | Low Risk (Green)       | Low Risk (Green)                | Low Risk (Green)                      | Low Risk (Green) | Low Risk (Green)        | Moderate Risk (Orange)       | High Risk (Red)        |
| Montero Ruiz (2015) |                       | High Risk (Red)        | Low Risk (Green)       | Low Risk (Green)                | Moderate Risk (Orange)                | Low Risk (Green) | Low Risk (Green)        | Moderate Risk (Orange)       | High Risk (Red)        |
| Montero Ruiz (2015) |                       | High Risk (Red)        | Low Risk (Green)       | Low Risk (Green)                | Moderate Risk (Orange)                | Low Risk (Green) | Low Risk (Green)        | Moderate Risk (Orange)       | High Risk (Red)        |
| Iberti (2016)       |                       | High Risk (Red)        | Low Risk (Green)       | Low Risk (Green)                | Moderate Risk (Orange)                | Low Risk (Green) | Low Risk (Green)        | Moderate Risk (Orange)       | High Risk (Red)        |
| Noticewala (2016)   |                       | High Risk (Red)        | Low Risk (Green)       | Low Risk (Green)                | Moderate Risk (Orange)                | Low Risk (Green) | Low Risk (Green)        | Moderate Risk (Orange)       | High Risk (Red)        |
| Rohatgi (2016)      |                       | Moderate Risk (Orange) | Low Risk (Green)       | Low Risk (Green)                | Low Risk (Green)                      | Low Risk (Green) | Low Risk (Green)        | Moderate Risk (Orange)       | Moderate Risk (Orange) |
| Soong (2016)        |                       | High Risk (Red)        | Low Risk (Green)       | Low Risk (Green)                | Low Risk (Green)                      | Low Risk (Green) | Low Risk (Green)        | Moderate Risk (Orange)       | High Risk (Red)        |
| Rohatgi (2018)      |                       | Moderate Risk (Orange) | Low Risk (Green)       | Low Risk (Green)                | Low Risk (Green)                      | Low Risk (Green) | Low Risk (Green)        | Moderate Risk (Orange)       | Moderate Risk (Orange) |

**eFigure 1.** Forest Plot for Unadjusted Length of Stay by Physician-Only or Multidisciplinary Team (MDT) Model

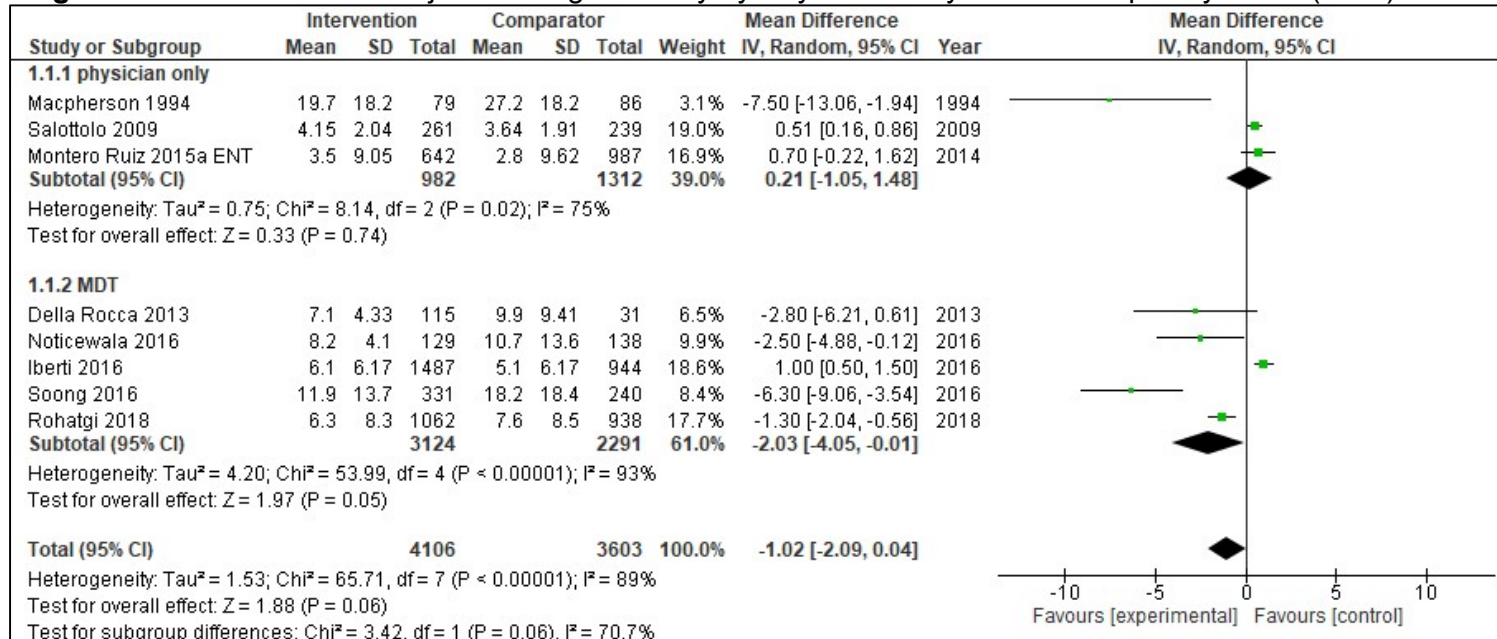

**eFigure 2.** Forest Plot for Unadjusted Length of Stay by Elective or Emergency Status

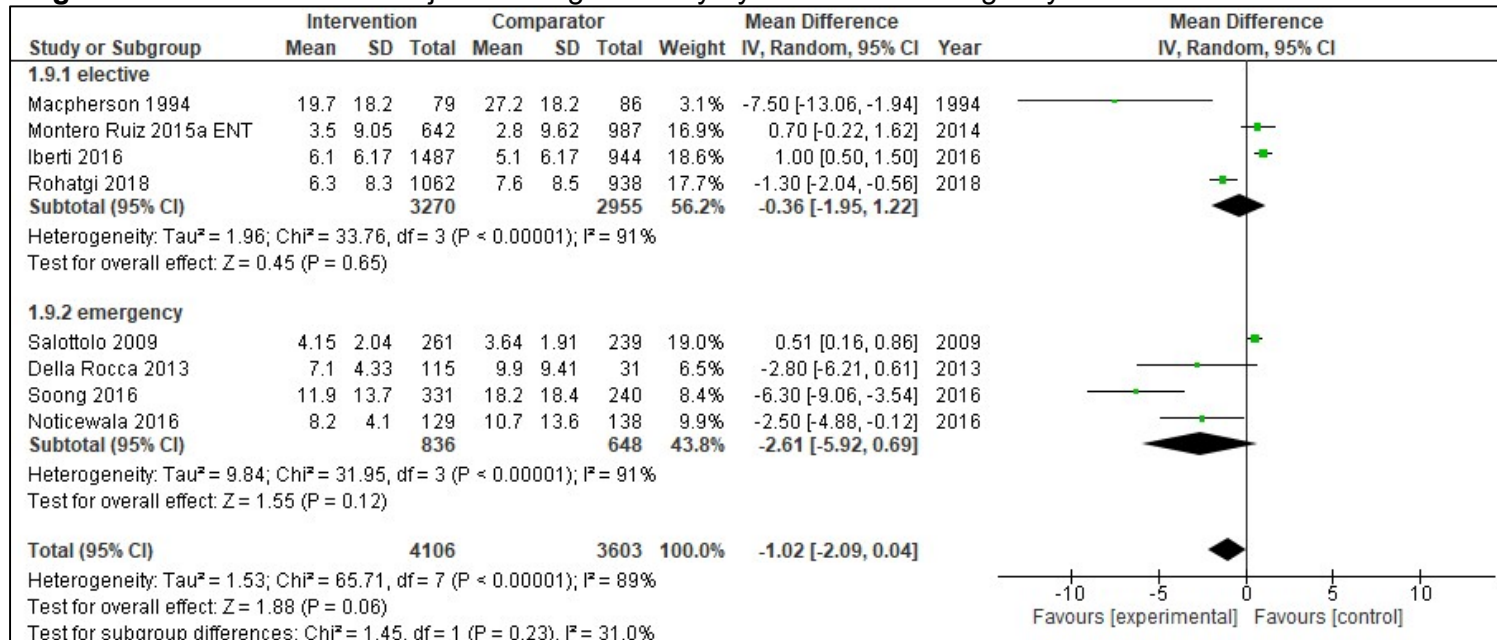

**eFigure 3.** Funnel Plots for Length of Stay, Mortality, and Readmissions

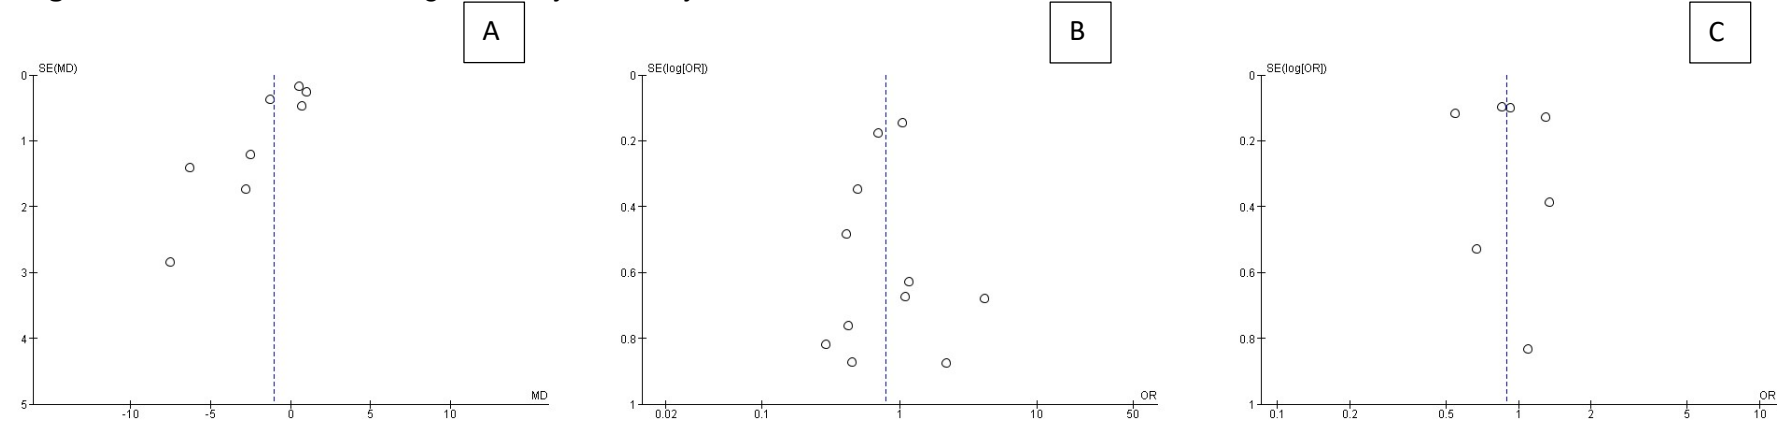

SE standard error, MD mean difference, OR odds ratio



**eFigure 4.** Forest Plot for In-Hospital Mortality by Physician-Only or Multidisciplinary Team (MDT) Model

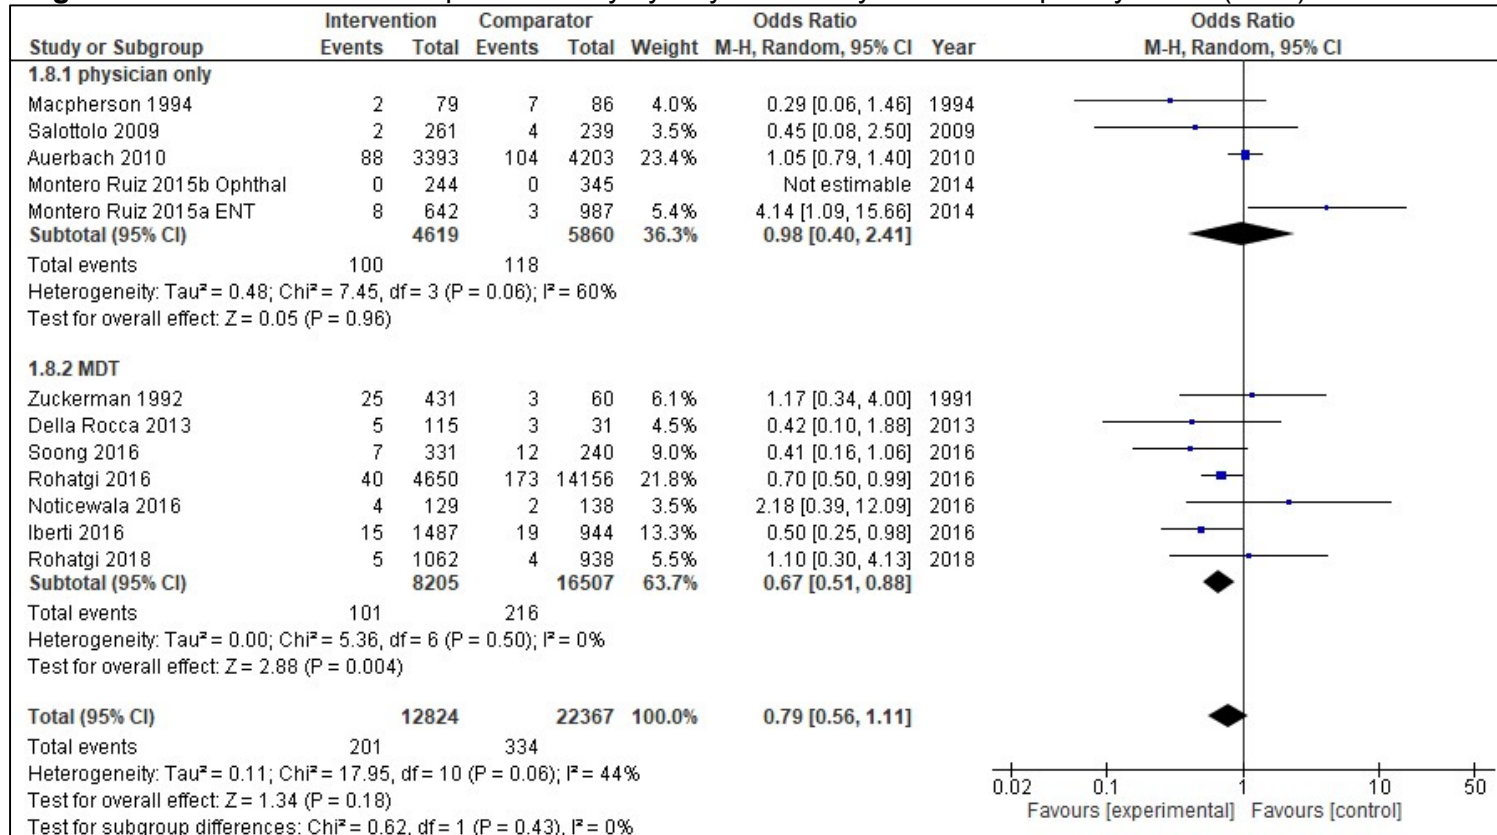

**eFigure 5.** Forest Plot for In-Hospital Mortality by Elective or Emergency Status

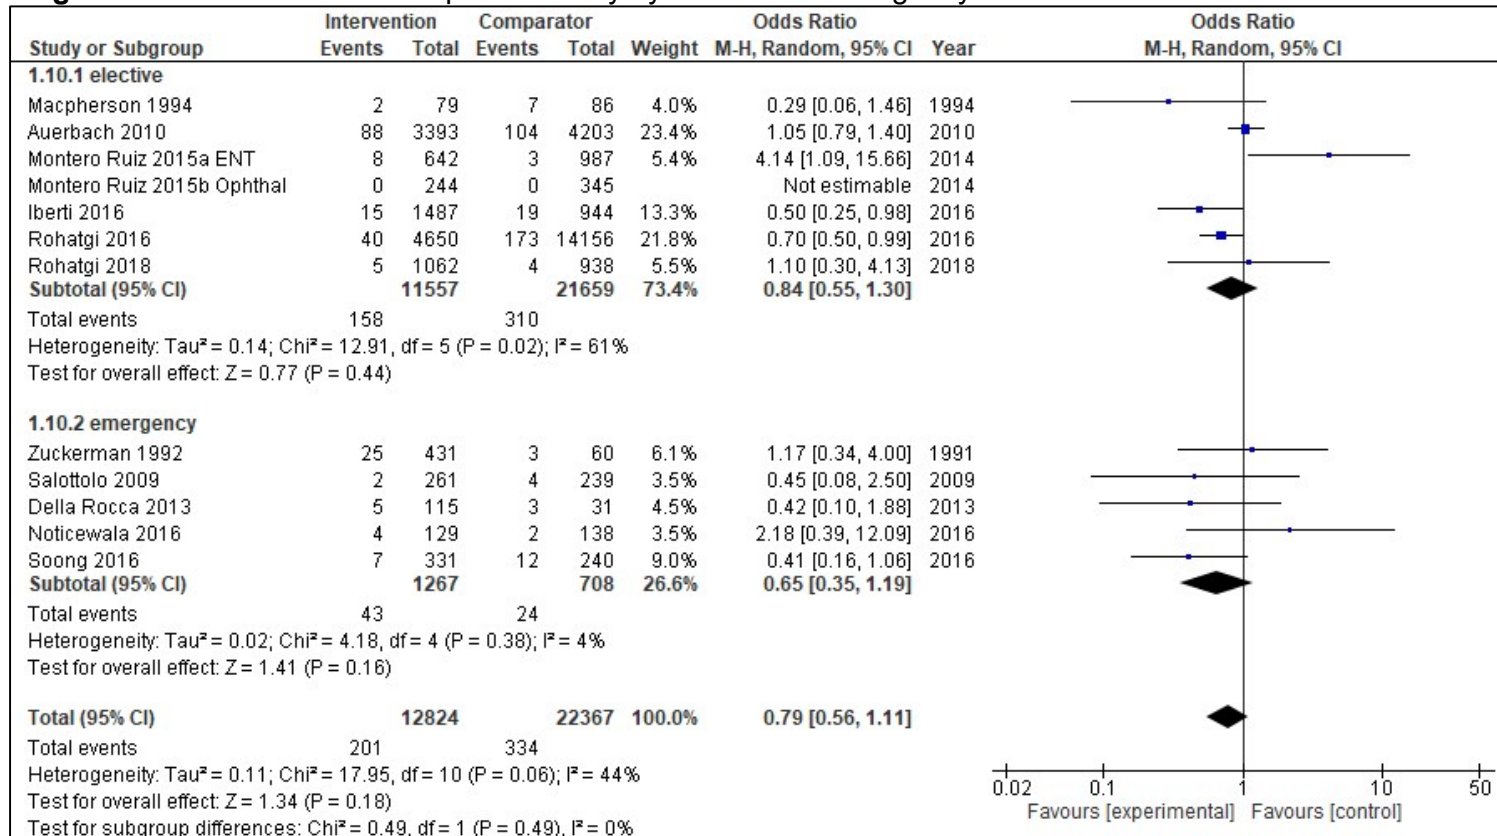

**eFigure 6. Forest Plot for 30-Day Readmissions**

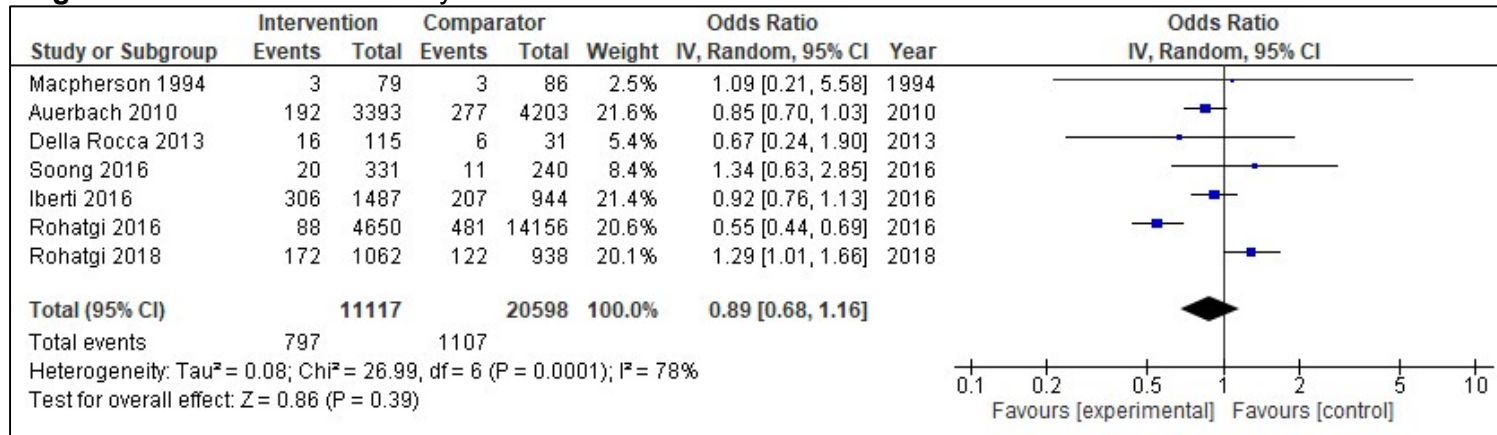

Supplement: jamanetwopen-3-e204088-s001.pdf [file jamanetwopen-3-e204088-s001.pdf]
